# Supplementary material for: Harnessing Intronic microRNA Structures to Improve Tolerance and Expression of shRNAs in Animal Cells
Source: MDPI journal article supplement (doi:10.3390/mps5010018), 2022-02-10
Supplement: s1 [file s1]

## Supplementary figure legends

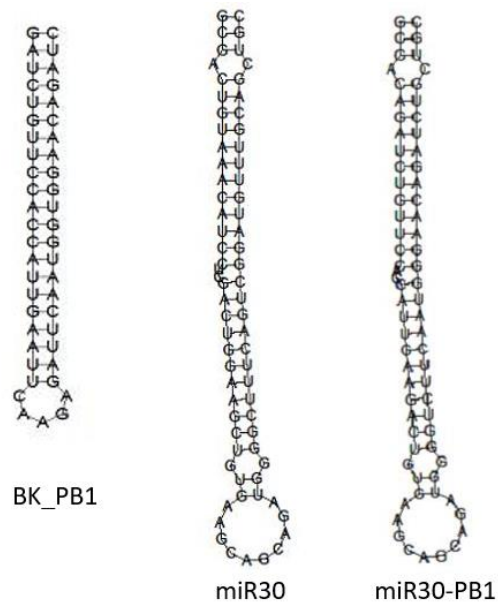

**Figure S1.** Mfold schematics of shRNAs with traditional Brummelkamp (BK) loop and miR30 adapted structures. The PB1 siRNA sequence was embedded in the miR30 structure (miR30-PB1) with both the sense and antisense sequence connected by a loop. The natural miRNA sequence is shown alongside of miR30-PB1.

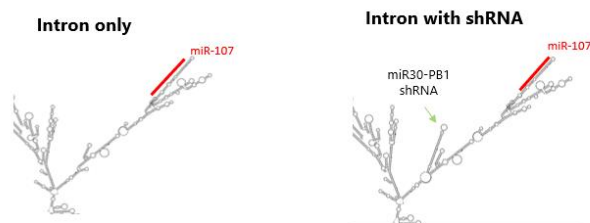

**Figure S2.** The predicted RNA secondary structures of a section of the natural intron 5 of PANK1 without (left) and with shRNA (right). The miR107 sequence is highlighted in red colour and the green arrow indicates the inserted miR30-PB1 shRNA within the intron. .

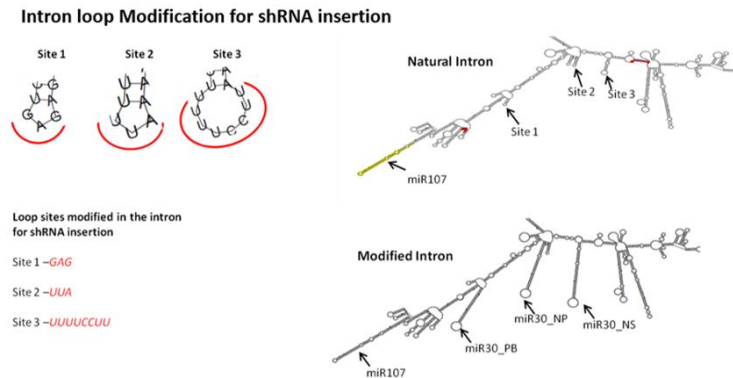

**Figure S3.** The selected loop sequences downstream of miR107 to be replaced with the miR30-PB1, miR30-NP and miR30-NS are highlighted in red colour. The comparison of the predicted secondary structure of the natural intron (top) and intron with three shRNAs (bottom) is also shown.

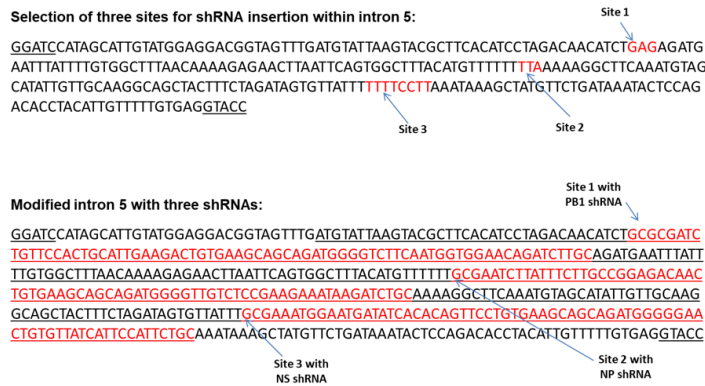

**Figure S4.** The selected intron 5 region of the PANK1 gene to insert three shRNAs. The three selected sites downstream to miR-107 are highlighted in red (top) and the intron sequence with PB1, NP and NS shRNA was provided (bottom). The intron containing three shRNAs (466 bp) was oligo-synthesised and used to clone into pGI vector.

**Table S1.** Synthesised oligonucleotides used in this study.

| Name           | sequence                       |
|----------------|--------------------------------|
| GFP_fwd        | ACTGTCGACATGGTGAGCAAGGGGCGAGG  |
| GFP_rwd        | ACTGCGGCCGCTTACTTGTACAGCTCGTCC |
| SmaI_fwd       | GACCCGGGCCGAGGTGAAG            |
| SmaI_rev       | CTTCACCTCGGCCCGGGTC            |
| Intron_107_fwd | GTAAGATGGTGTATTTACTATGAGC      |
| Intron_107_rev | CTGTAAAATTGAAAAGCAG            |
| BamHI_int_fwd  | ACTAGATGGGATCCATAGC            |
| BamHI_int_rev  | GCTATGGATCCCATCTAGT            |
| KpnI_int_fwd   | TGTGAGGTACCGCTCTAAC            |
| KpnI_int_rev   | GTTAGAGCGGTACCTCACA            |

|                   |                                                                                          |
|-------------------|------------------------------------------------------------------------------------------|
| BK_PB1_fwd        | GATCGATCTGTTCCACCATTGAATTCAAGAGATTC<br>AATGGTGGAACAGATCGTAC                              |
| BK_PB1_rev        | GATCTGTTCCACCATTGAATCTCTTGAATTCAATGG<br>TGGAACAGATC                                      |
| miR30_<br>PB1_fwd | GATCGCGACAGATCTGTTCCACCATTGAAGACTGT<br>GAAGCAGCAGATGGGGTCTTCAATGGGAACAGAT<br>CTGCTGCGTAC |
| miR30_PB1_rev     | GCAGCAGATCTGTTCCCATTTGAAGACCCCATCTGC<br>TGCTTCACAGTCTTCAATGGTGGAACAGATCTGTCC<br>C        |
| PB1_luc_fwd       | CTCGAGGGAGATCATTCGAGCTGAAG                                                               |
| PB1_luc_rev       | GCGGCCGCCCCGTCTGAGTTCTTCAATGG                                                            |
| NP_luc_fwd        | GCGCTCGAGACCAAATGAGAATCCAGCAC                                                            |
| NP_luc_rev        | AGCGCGGCCGCAATTGTCGTAATCCTCTGCA                                                          |
| NS_luc_fwd        | ATGCTCGAGGTACTCTCGGTCTGGACATC                                                            |
| NS_luc_rev        | ATCGCGGCCGCTTCCCGCCATTTCTCGTTTC                                                          |
| miR-PTA           | GAGGCGAGCACAGAATTAATACGACTCCATATAG<br>GTTTTTTTTTTTTVN                                    |
| PAM-URP           | GAGGCGAGCACAGAATTAATACGAC                                                                |
| miR107            | GCAGCAGCATTGTACAGGGCT                                                                    |
| miR26a            | GCCTTCAAGTAATCCAGGATAGG                                                                  |
| PB1               | CGCTTCAATGGTGGAACAGATC                                                                   |
| 5S                | TGGGAATACCGGGTGCTGT                                                                      |
| Poly-A_fwd        | ACTGCGGCCGCGACTCTAGATCA                                                                  |
| Poly-A_rev        | ACTGAATTCACGCTTACAATTTACGC                                                               |

**Table S2.** siRNA sequences used in this study.

| Name     | Sequence (5' – 3')  |
|----------|---------------------|
| PB1-2257 | GATCTGTTCCACCATTGAA |
| NP       | GATCTGTTCCACCATTGAA |
| NS1/NEP  | AATGGAATGATAACACAGT |
